# Supplementary material for: Characterization of atmospheric methane release in the outer Mackenzie River delta from biogenic and thermogenic sources
Source: Copernicus journal article supplement (doi:10.5194/tc-17-5283-2023), 2023-12-13
Supplement: Supplementary file 1 [file tc-17-5283-2023-supplement.pdf]

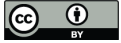

*Supplement of*

## **Characterization of atmospheric methane release in the outer Mackenzie River delta from biogenic and thermogenic sources**

**Daniel Wesley et al.**

*Correspondence to:* Daniel Wesley ([dwesley@stfx.ca](mailto:dwesley@stfx.ca))

The copyright of individual parts of the supplement might differ from the article licence.

## Supplemental Results

An outline of the sites sampled during this study are included in Table S1. Pingo 1, Lake 1, Wetland 2 and Wetland 3 were included in the main analysis despite low  $R^2$  values. The Keeling plot intercept for Wetland 2 and Wetland 3 were low enough that even with a lower confidence in the signature we can still have confidence that it is within the range of biogenic values.

- 5 Pingo 1 and Lake 1 were included because high  $\text{CH}_4$  concentration samples clearly indicated a shift towards a thermogenic source despite the poor fit of the keeling plot. This adds confidence to the interpretation even with a low  $R^2$  value. A few high concentration samples cannot verify the source signature, but they can indicate that the source has a signature that is higher (thermogenic) or lower (biogenic) than the atmospheric background value.

10 **Table S1: Site locations and  $\text{CH}_4$  source isotopic signatures.**

| Site                                                              | Latitude | Longitude  | Source $\delta^{13}\text{C}-\text{CH}_4$<br>(‰) | $R^2$ | Max $\text{CH}_4$<br>(ppm) | Max wind<br>speed (km/h) | Site Type    |
|-------------------------------------------------------------------|----------|------------|-------------------------------------------------|-------|----------------------------|--------------------------|--------------|
| Wetland 1 (fall)                                                  | 68.9691° | -134.7168° | -88.3                                           | 0.999 | 62.50                      | 16.2                     | Aquatic seep |
| Pingo 3 (fall)                                                    | 68.9393° | -134.4114° | -73.6                                           | 0.987 | 3.19                       | 2.6                      | Aquatic seep |
| channel seep                                                      | 69.3197° | -135.4775° | -42.5                                           | 0.982 | 27.00                      | 10.5                     | Aquatic seep |
| Wetland 1 (summer)                                                | 68.9691° | -134.7168° | -56.4                                           | 0.927 | 18.46                      | 5.0                      | Aquatic seep |
| Pingo 2                                                           | 69.2856° | -135.5039° | -63.6                                           | 0.845 | 2.58                       | 10.5                     | Airborne EC  |
| Pingo 1                                                           | 69.0888° | -135.7951° | -53.0                                           | 0.722 | 5.62                       | 5.5                      | Airborne EC  |
| Wetland 3                                                         | 69.2088° | -135.2714° | -71.9                                           | 0.675 | 2.23                       | 6.0                      | Airborne EC  |
| Wetland 2                                                         | 68.9243° | -135.3883° | -78.4                                           | 0.596 | 2.19                       | 10.0                     | Airborne EC  |
| Lake 1 (summer)                                                   | 69.2294° | -135.2441° | -44.7                                           | 0.480 | 7.57                       | N/A                      | Aquatic seep |
| <b>Sites sampled but not reported due to low <math>R^2</math></b> |          |            |                                                 |       |                            |                          |              |
| Pingo 1 (fall)                                                    | 69.0888° | -135.7951° | -2.9                                            | 0.434 | 2.02                       | 14.2                     | Airborne EC  |
| Pingo 3 (summer)                                                  | 68.9393° | -134.4114° | -59.0                                           | 0.119 | 2.26                       | 3.6                      | Aquatic seep |
| Lake 1 (fall)                                                     | 69.2294° | -135.2441° | -79.3                                           | 0.040 | 2.09                       | 14.0                     | Aquatic seep |
| Site 9                                                            | 68.9466° | -135.8452° | -35.0                                           | 0.016 | 1.98                       | 3.5                      | Airborne EC  |

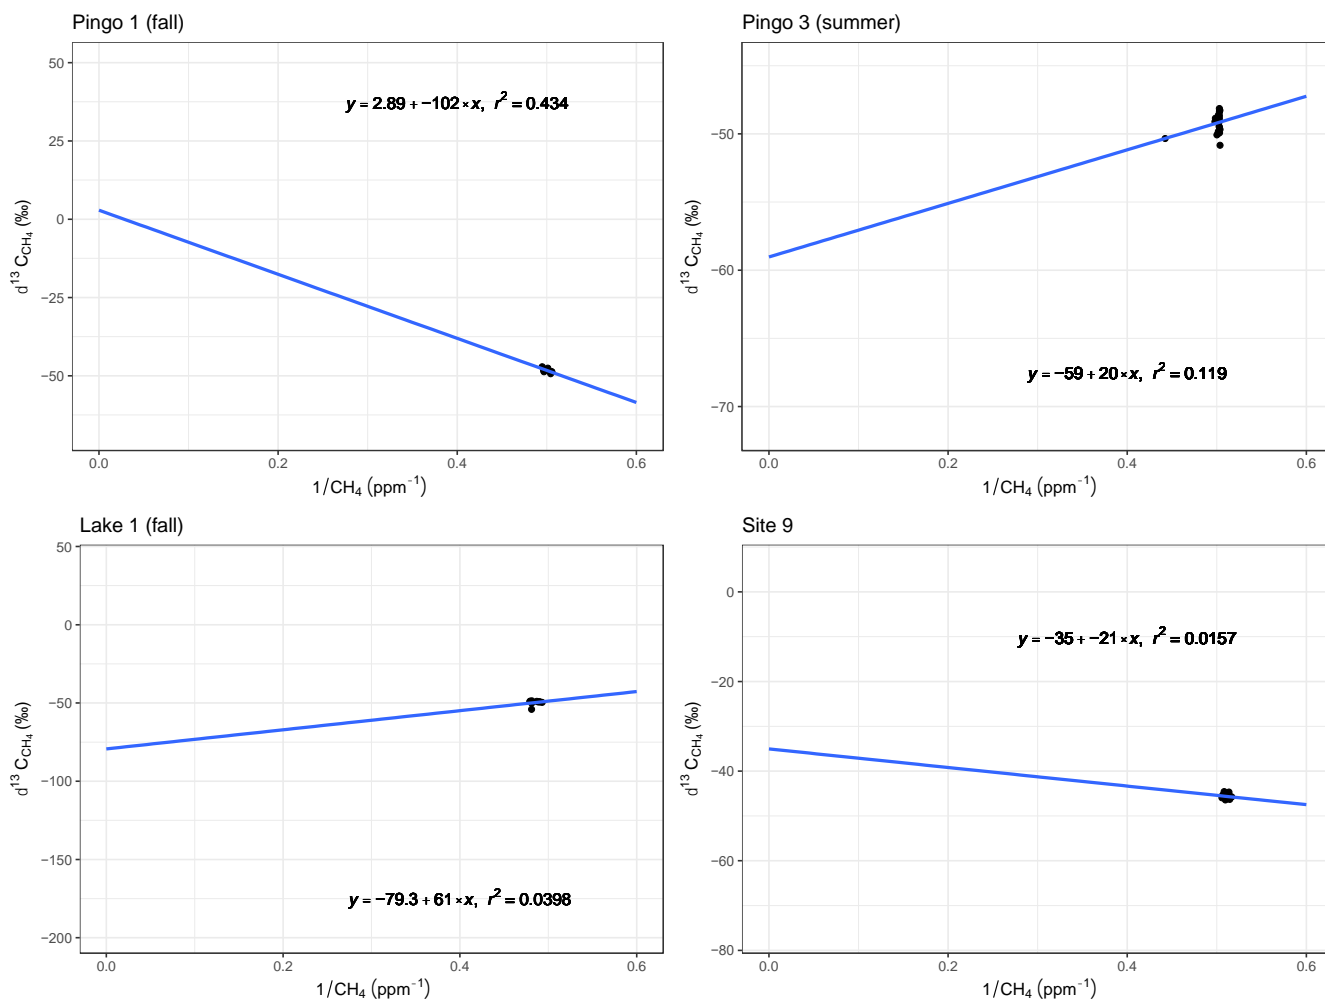

15 **Figure S1: Keeling plots for Pingo 1 (fall), Site 9, Pingo 3 (summer), Lake 1 (fall) and Site 10. Pingo 1, Site 9 and Site 10 were identified as areas of high flux rate by aerial surveys but could not be verified during this study. Pingo 3 and Lake 1 were identified in October by holes in the ice caused by high rate ebullition. Regression analysis was inconclusive and not included in the main analysis. All plots had low  $R^2$  values due to low  $\text{CH}_4$  concentrations. The maximum  $\text{CH}_4$  measured at any site was at Pingo 3 and was 2.261 ppm.**
